# Supplementary material for: Defect-derived catalytic sites in Ce/Zr-UiO-66 for degradation of hexachlorobenzene
Source: Royal Society of Chemistry journal article supplement (doi:10.1039/d4dt02951h), 2024-12-12
Supplement: d4dt02951h1.pdf [file d4dt02951h1.pdf]

# Supporting Information

## Defect-derived Catalytic Sites in Ce/Zr-Uio-66 for Degradation of Hexachlorobenzene

Zhengyan Wang<sup>a</sup>, Chenhao Yuan<sup>a</sup>, Dong Yang<sup>a</sup>, Mifen Cui<sup>a</sup>, Jihai Tang<sup>a</sup>,  
Zhuxiu Zhang<sup>a,\*</sup> and Xu Qiao<sup>a,\*</sup>

*<sup>a</sup>State Key Laboratory of Materials-Oriented Chemical Engineering, College of Chemical Engineering, Nanjing Tech University, No. 30 Puzhunan Road, Nanjing 211816, China*

*\*Corresponding author. Tel.: +86 25 83587168; E-mail: [zhuxiu.zhang@njtech.edu.cn](mailto:zhuxiu.zhang@njtech.edu.cn)*

*\*Corresponding author. Tel.: +86 25 83172298; E-mail: [qct@njtech.edu.cn](mailto:qct@njtech.edu.cn)*

## **Table of Contents**

- S1 The number of formate ligands on the clusters of Ce/Zr-UiO-66-FA post-treatment at different temperatures.**
- S2 IR Spectra with Ce/Zr-UiO-66-FA at high temperature in N<sub>2</sub>**
- S3 TGA curves of Ce/Zr-UiO-66-FA and Ce/Zr-UiO-66-FA-P**
- S4 Reproducibility Tests of post-treatment over Ce/Zr-UiO-66-FA**
- S5 Characterization of Ce/Zr-UiO-66, Ce/Zr-UiO-66 MeOH treatment and Ce/Zr-UiO-66-P**
- S6 Pore size distributions for Ce/Zr-UiO-66-P and Ce/Zr-UiO-66-FA-P.**
- S7 SEM images of Ce/Zr-UiO-66-P and Ce/Zr-UiO-66-FA-P**
- S8 HR-TEM image and EDS spectra of Ce/Zr-UiO-66-FA and Ce/Zr-UiO-66-FA-P.**
- S9 HAADF-STEM image and EDS element mapping of Ce/Zr-UiO-66-FA and Ce/Zr-UiO-66-FA-P.**
- S10 Raman spectra of Zr-UiO-66, Ce/Zr-UiO-66-FA-P and Ce-UiO-66.**
- S11 H<sub>2</sub>-TPR and Cyclic voltammetry of Ce/Zr-UiO-66-FA and Ce/Zr-UiO-66-FA-P.**
- S12 The effect of different solvents on the catalytic degradation of HCB over Ce/Zr-UiO-66-FA-P**
- S13 The different the number of open metal sites in the Ce/Zr-UiO-66-FA-P metal clusters of the degradation efficiency and carbon distribution of the products in the catalytic degradation of HCB**
- S14 The effect of crystal size and the number of defects on the surface acidity and degradation efficiency for HCB.**
- S15 The kinetic constants for the Zr-UiO-66, Ce/Zr-UiO-66-FA-P and Ce-UiO-66 in the catalytic degradation of HCB**
- S16 The activation energies TON and TOF for Zr-UiO-66, Ce/Zr-UiO-66-FA-P, Ce-UiO-66, H<sub>2</sub>BDC, ZrCl<sub>4</sub> and Ce(NH<sub>3</sub>)<sub>2</sub>(NO<sub>3</sub>) in the catalytic degradation of HCB**
- S17 PXRD pattern of Ce<sub>x</sub>Zr<sub>1-x</sub>O<sub>2</sub>**

- S18 GC chromatograms of CO and CO<sub>2</sub>**
- S19 Degradation efficiency of HCB over Metal Oxides and MOFs at 250 °C**
- S20 PXRD patterns of the Zr-UiO-66, Ce-UiO-66, Zr-MOF-808, Zr-hcp UiO-66, Al-MIL-53 and Ti-MIL-125**
- S21 Carbon distribution of the products over Metal Oxides and MOFs in the degradation of HCB at 250 °C**
- S22 Degradation efficiency of HCB and Carbon distribution of the products over Benchmarked acid/redox catalysts in the catalytic degradation of HCB.**
- S23 Characterization of catalysts after stability tests**
- S24 Carbon distribution of the products for the catalytic degradation of HCB in the catalytic stability testing of Ce/Zr-UiO-66-FA-P**
- S25 Reusability of spent catalysts**
- S26 Ce 3d XPS spectra of Ce/Zr-UiO-66-FA-P at 30 minutes during the catalytic degradation of HCB.**

**S1 The number of formate ligands on the clusters of Ce/Zr-UiO-66-FA post-treatment at different temperatures.**

**Table S1.** The number of formate ligands on the Ce/Zr-UiO-66-FA-P clusters after post-treatment at different temperatures.

| <b>Samples</b>          | <b>After post-treatment<br/>number of formate ligands per cluster</b> |
|-------------------------|-----------------------------------------------------------------------|
| Ce/Zr-UiO-66-FA-P-80°C  | 1.55                                                                  |
| Ce/Zr-UiO-66-FA-P-120°C | 0.43                                                                  |
| Ce/Zr-UiO-66-FA-P-150°C | 0.00                                                                  |
| Ce/Zr-UiO-66-FA-P-200°C | 0.00                                                                  |
| Ce/Zr-UiO-66-FA-P-250°C | 0.00                                                                  |

## S2 IR Spectra with Ce/Zr-UiO-66-FA at high temperature in N<sub>2</sub>

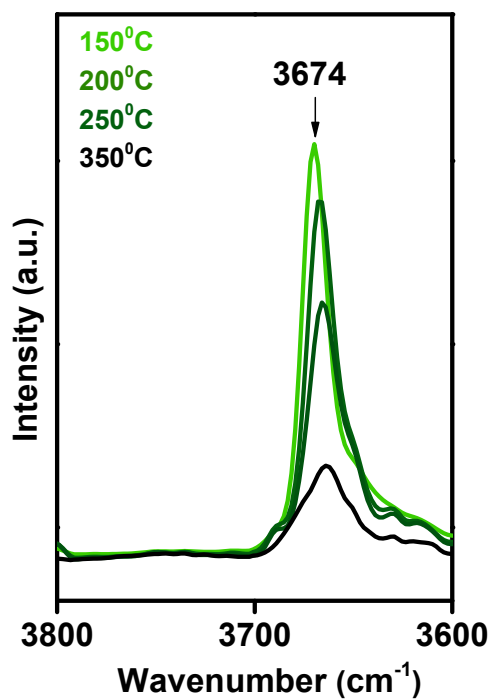

**Figure S1.** IR spectra in the hydroxyl-group region characterizing Ce/Zr-UiO-66-FA in flowing N<sub>2</sub> as the temperature was ramped from 150 to 350 °C.

### S3 TGA curves of Ce/Zr-UiO-66-FA and Ce/Zr-UiO-66-FA-P

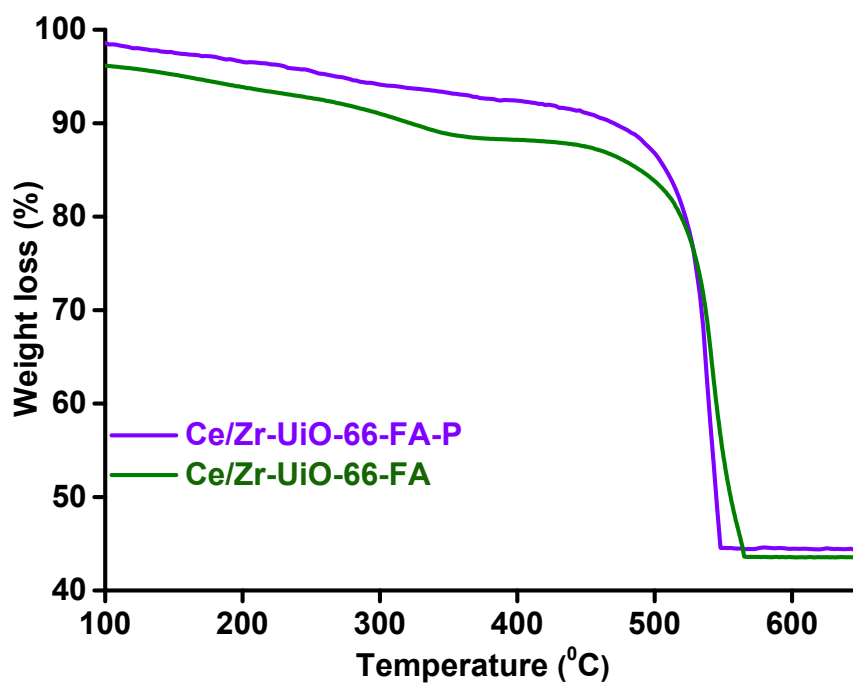

Figure S2. TGA curves of Ce/Zr-UiO-66-FA and Ce/Zr-UiO-66-FA-P.

## S4 Reproducibility Tests of post-treatment over Ce/Zr-UiO-66-FA

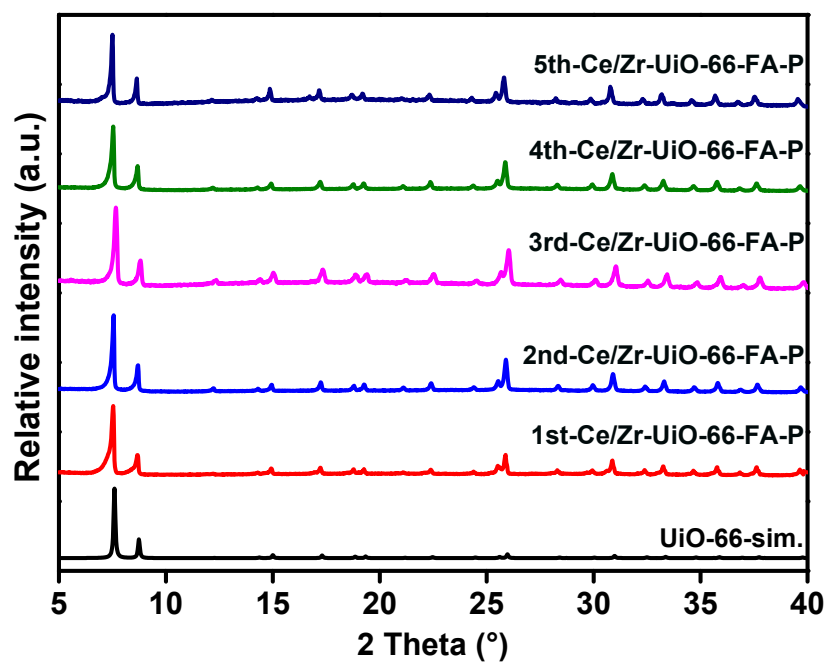

Figure S3. PXRD patterns of Ce/Zr-UiO-66-FA-P

Table S2. BET surface area and number of ligands per metal cluster for Ce/Zr-UiO-66-FA-P.

| Samples               | BET surface area (m <sup>2</sup> /g) | Number of ligands per cluster |
|-----------------------|--------------------------------------|-------------------------------|
| 1st-Ce/Zr-UiO-66-FA-P | 1349                                 | 0.00                          |
| 2nd-Ce/Zr-UiO-66-FA-P | 1357                                 | 0.00                          |
| 3rd-Ce/Zr-UiO-66-FA-P | 1350                                 | 0.00                          |
| 4th-Ce/Zr-UiO-66-FA-P | 1345                                 | 0.00                          |
| 5th-Ce/Zr-UiO-66-FA-P | 1352                                 | 0.00                          |

## S5 Characterization of Ce/Zr-UiO-66, Ce/Zr-UiO-66 MeOH treatment and Ce/Zr-UiO-66-P

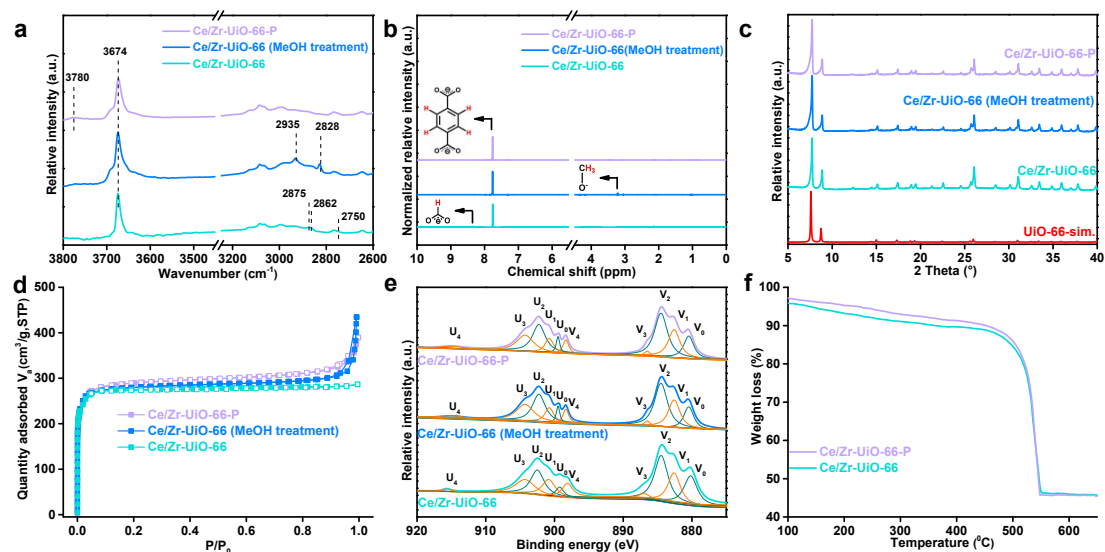

**Figure S4.** (A) FT-IR spectra, (B)  $^1\text{H}$  NMR, (C) PXRD patterns, (D) Nitrogen adsorption and desorption isotherms, (E) Ce 3d XPS spectra of Ce/Zr-UiO-66, Ce/Zr-UiO-66 (MeOH treatment) and Ce/Zr-UiO-66-P; (F) TGA curves of Ce/Zr-UiO-66 and Ce/Zr-UiO-66-P.

**Table S3.** BET surface area, number of formate/methoxy ligands per metal cluster and Ce content for Ce/Zr-UiO-66, Ce/Zr-UiO-66 (MeOH treatment) and Ce/Zr-UiO-66-P.

| Samples                       | BET surface area (m <sup>2</sup> /g) | Number of formate ligands per cluster | Number of methoxy ligands per cluster | Ce (wt%) |
|-------------------------------|--------------------------------------|---------------------------------------|---------------------------------------|----------|
| Ce/Zr-UiO-66                  | 981                                  | 0.19                                  | -                                     | 4.07     |
| Ce/Zr-UiO-66 (MeOH treatment) | 988                                  | 0.00                                  | 0.19                                  | 4.07     |
| Ce/Zr-UiO-66-P                | 995                                  | 0.00                                  | 0.00                                  | 4.08     |

Based on Figure S4 and Table S3, it is shown that the structural changes of the post-treatment material Ce/Zr-UiO-66-P was consistent with Ce/Zr-UiO-66-FA-P, with no change in crystal structure and BET surface area. In the Ce/Zr-UiO-66-P, the valence state of Ce atoms presented a mixed valence state of Ce(III) and Ce(IV). The complete substitution of formate ligands on the cluster of Ce/Zr-UiO-66-P with terminal hydroxyl groups was demonstrated by  $^1\text{H}$  NMR and FT-IR.



## S6 Pore size distributions for Ce/Zr-UiO-66-P and Ce/Zr-UiO-66-FA-P.

P.

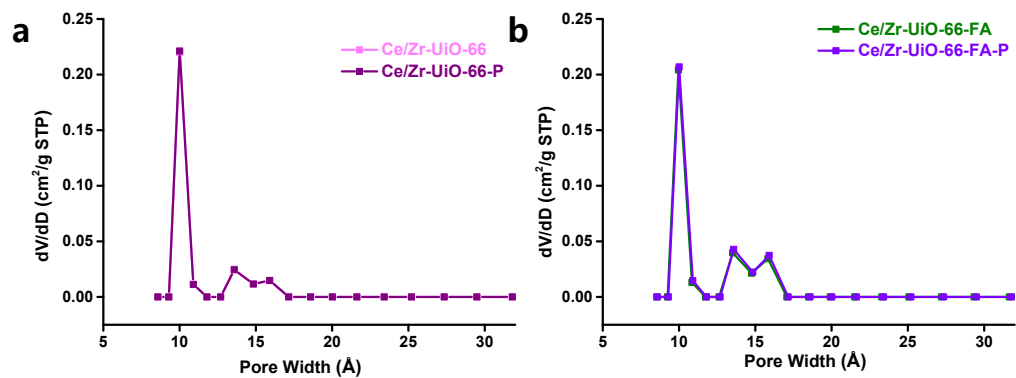

**Figure S5.** Pore size distributions calculated by DFT method for (a) Ce/Zr-UiO-66 and Ce/Zr-UiO-66-P; (b) Ce/Zr-UiO-66-FA and Ce/Zr-UiO-66-FA-P.

**Table S4.** Pore volume of Ce/Zr-UiO-66-P and Ce/Zr-UiO-66-FA-P calculated by DFT method

| Samples           | Pore Volume (cm <sup>3</sup> /g) |
|-------------------|----------------------------------|
| Ce/Zr-UiO-66      | 0.52                             |
| Ce/Zr-UiO-66-P    | 0.52                             |
| Ce/Zr-UiO-66-FA   | 0.63                             |
| Ce/Zr-UiO-66-FA-P | 0.64                             |

**S7 SEM Images of Ce/Zr-UiO-66-P and Ce/Zr-UiO-66-FA-P**

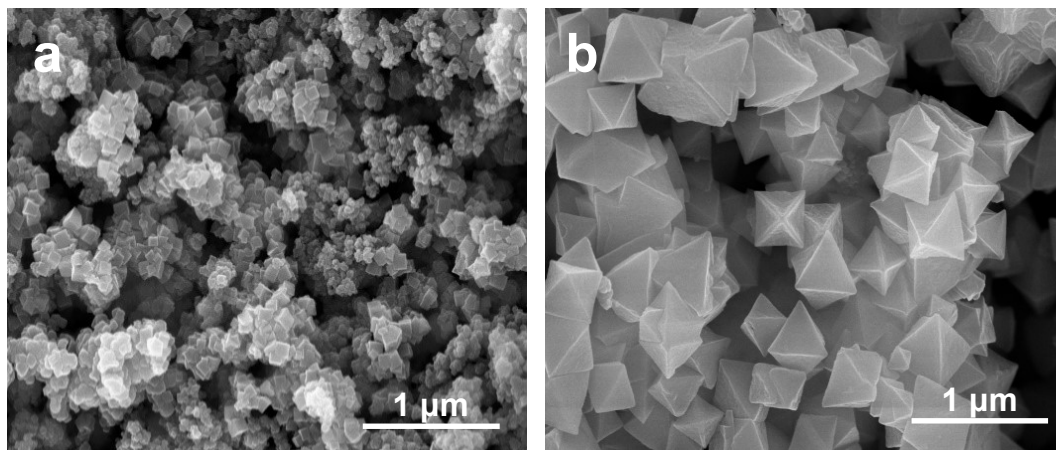

**Figure S6.** SEM images of (A) Ce/Zr-UiO-66-P and (B) Ce/Zr-UiO-66-FA-P.

**S8 HR-TEM image and EDS spectra of Ce/Zr-UiO-66-FA and Ce/Zr-UiO-66-FA-P.**

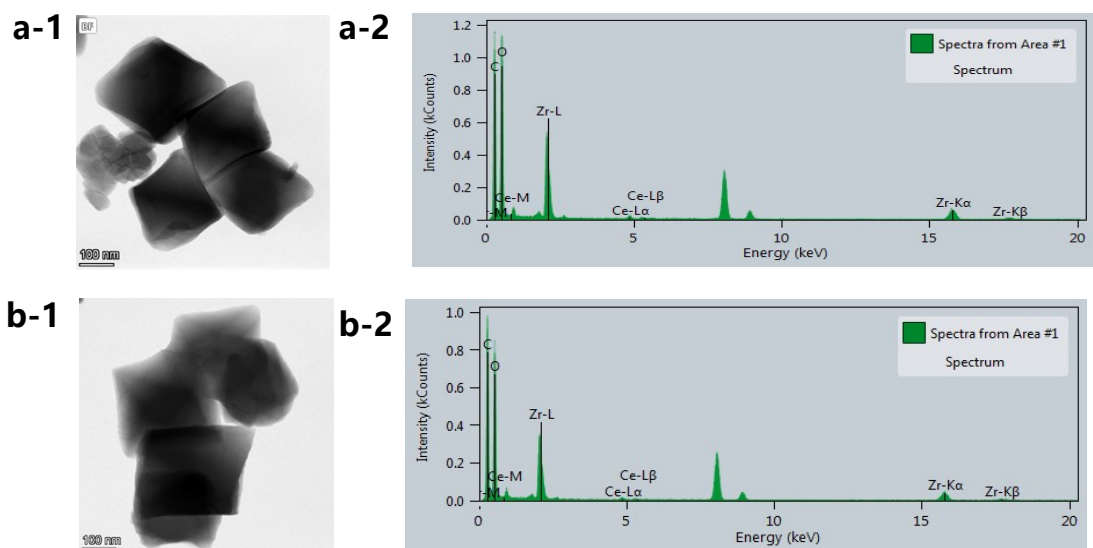

**Figure S7.** HR-TEM image (a-1) and EDS spectra (a-2) of Ce/Zr-UiO-66-FA; (b) HAADF-STEM image (b-1) and EDS spectra (a-2) of Ce/Zr-UiO-66-FA-P.

**S9 HAADF-STEM image and EDS element mapping of Ce/Zr-UiO-66-FA and Ce/Zr-UiO-66-FA-P.**

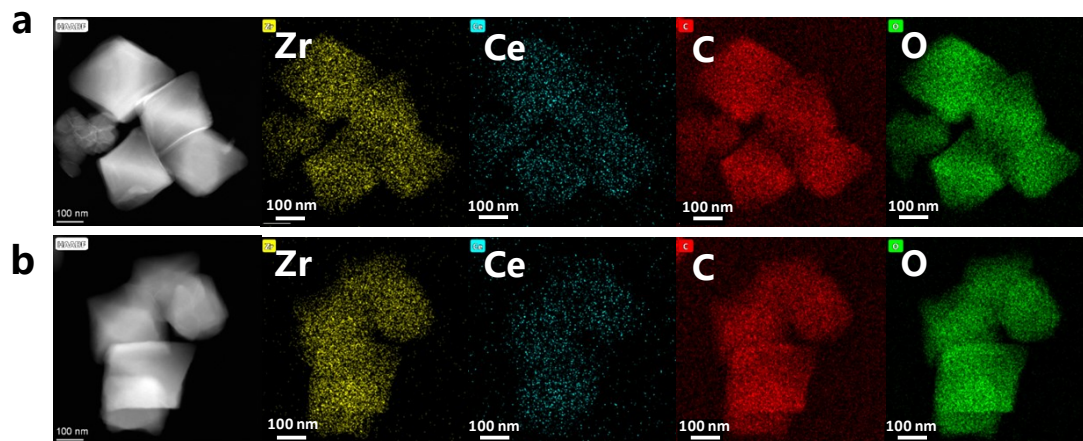

**Figure S8.** (a) HAADF-STEM image and EDS element mapping of Ce/Zr-UiO-66-FA; (b) HAADF-STEM image and EDS element mapping of Ce/Zr-UiO-66-FA-P. (Zr atoms: yellow, Ce atoms: blue, C atoms: red, O atoms: green)

**S10 Raman spectra of Zr-UiO-66, Ce/Zr-UiO-66-FA-P and Ce-UiO-66.**

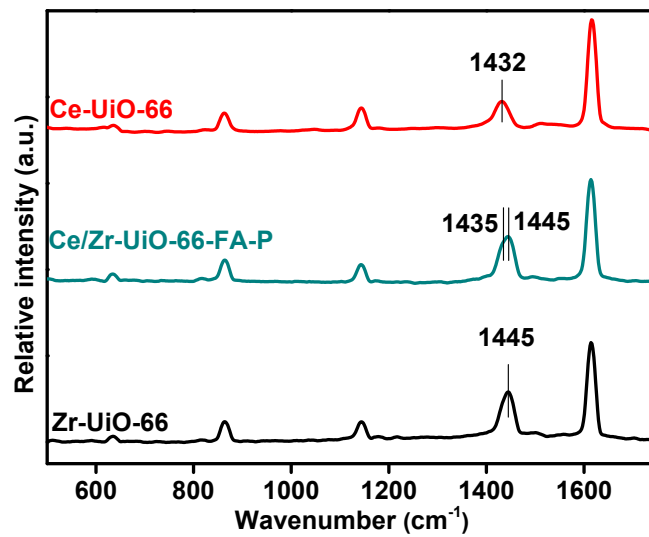

**Figure S9.** Raman spectra of Zr-UiO-66, Ce/Zr-UiO-66-FA-P and Ce-UiO-66

## S11 H<sub>2</sub>-TPR and Cyclic voltammetry of Ce/Zr-UiO-66-FA and Ce/Zr-UiO-66-FA-P.

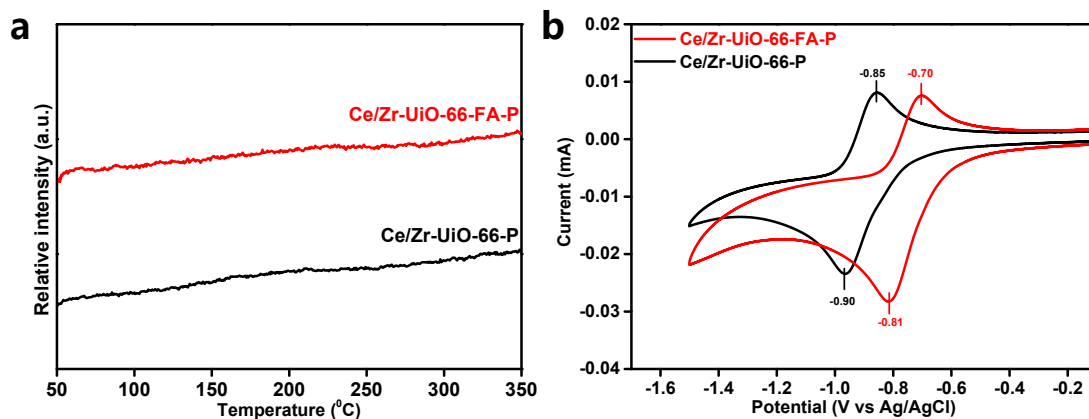

Figure S10. (a) H<sub>2</sub>-TPR and (b) Cyclic voltammetry of the Ce/Zr-UiO-66-P and Ce/Zr-UiO-66-FA-P

### Cyclic voltammetry test method

N-methylpyrrolidone (C<sub>5</sub>H<sub>9</sub>NO, purity 98%) and Polyvinylidene fluoride powder ((CH<sub>2</sub>CF<sub>2</sub>)<sub>n</sub>, average Mw ~ 400,000) were purchased from Aladdin.

Preparation of electrode sheet: a titanium plate (2 cm × 3 cm × 1 mm) was washed with ultrapure water for 15 min. The ground samples (0.3 g), N-methylpyrrolidone (0.01g) and polyvinylidene fluoride (1 mL) were mixed and then stirred evenly. The surface of the titanium plate was evenly coated with a mixture of agents and then dried in an oven (120 °C) for 120 min.

Cyclic voltammetry (CV) curve was measured by a three-electrode system. The glass carbon electrode (3 mm) served as the working electrode, the carbon as the counter electrode, and the reference electrode was the Ag wire. 0.1 M TBAP DMF was used as electrolyte. Electrocatalytic testing was performed at room temperature. The CV test parameters were: scanning speed = 0.1 V/s, initial potential = E<sub>oc</sub>, and final potential = -1.5 V.

## S12 The effect of different solvents on the catalytic degradation of HCB over Ce/Zr-UiO-66-FA-P

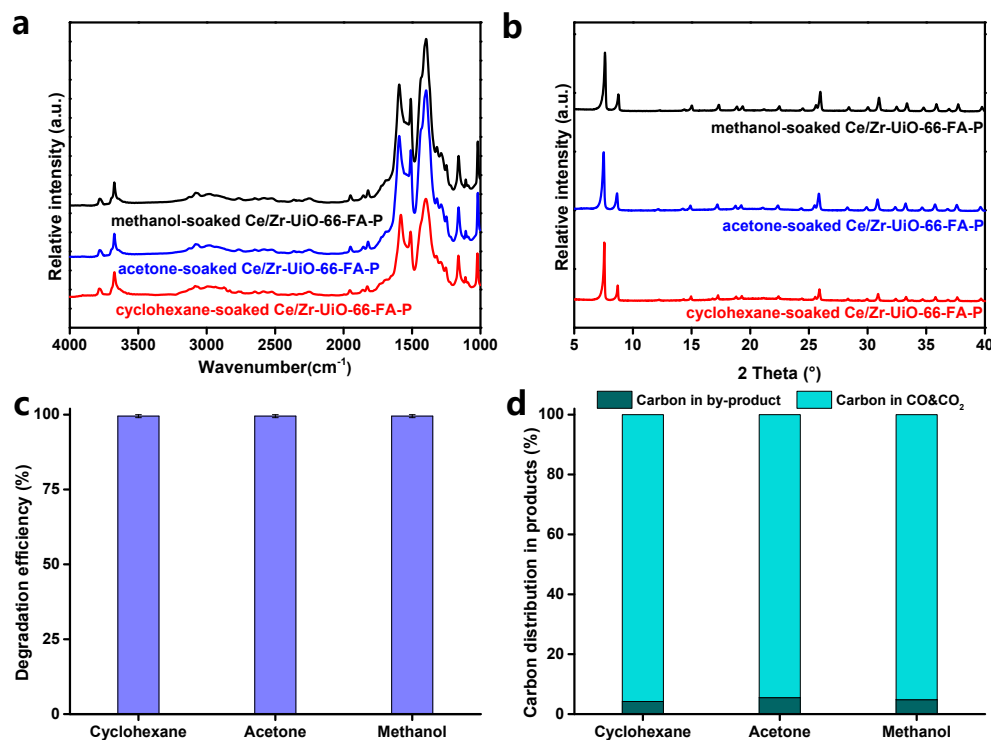

**Figure S11.** Cyclohexane-soaked Ce/Zr-UiO-66-FA-P, acetone-soaked Ce/Zr-UiO-66-FA-P and methanol-soaked Ce/Zr-UiO-66-FA-P of (a) after drying under high vacuum of FT-IR spectra; (b) after the reaction of the PXRD patterns; (c) Degradation efficiency and (d) Carbon distribution of the products for the catalytic degradation of HCB at 250 °C;

**Table S5** The kinetic constant and reaction rate for the catalytic degradation of HCB at 250 °C over cyclohexane-soaked Ce/Zr-UiO-66-FA-P, acetone-soaked Ce/Zr-UiO-66-FA-P and methanol-soaked Ce/Zr-UiO-66-FA-P

| Samples                              | kinetic constant (k)<br>(min <sup>-1</sup> ) | reaction rate<br>(mmol / (g*min)) |
|--------------------------------------|----------------------------------------------|-----------------------------------|
| cyclohexane-soaked Ce/Zr-UiO-66-FA-P | 0.077                                        | 0.0054                            |
| acetone-soaked Ce/Zr-UiO-66-FA-P     | 0.075                                        | 0.0053                            |
| methanol-soaked Ce/Zr-UiO-66-FA-P    | 0.076                                        | 0.0054                            |

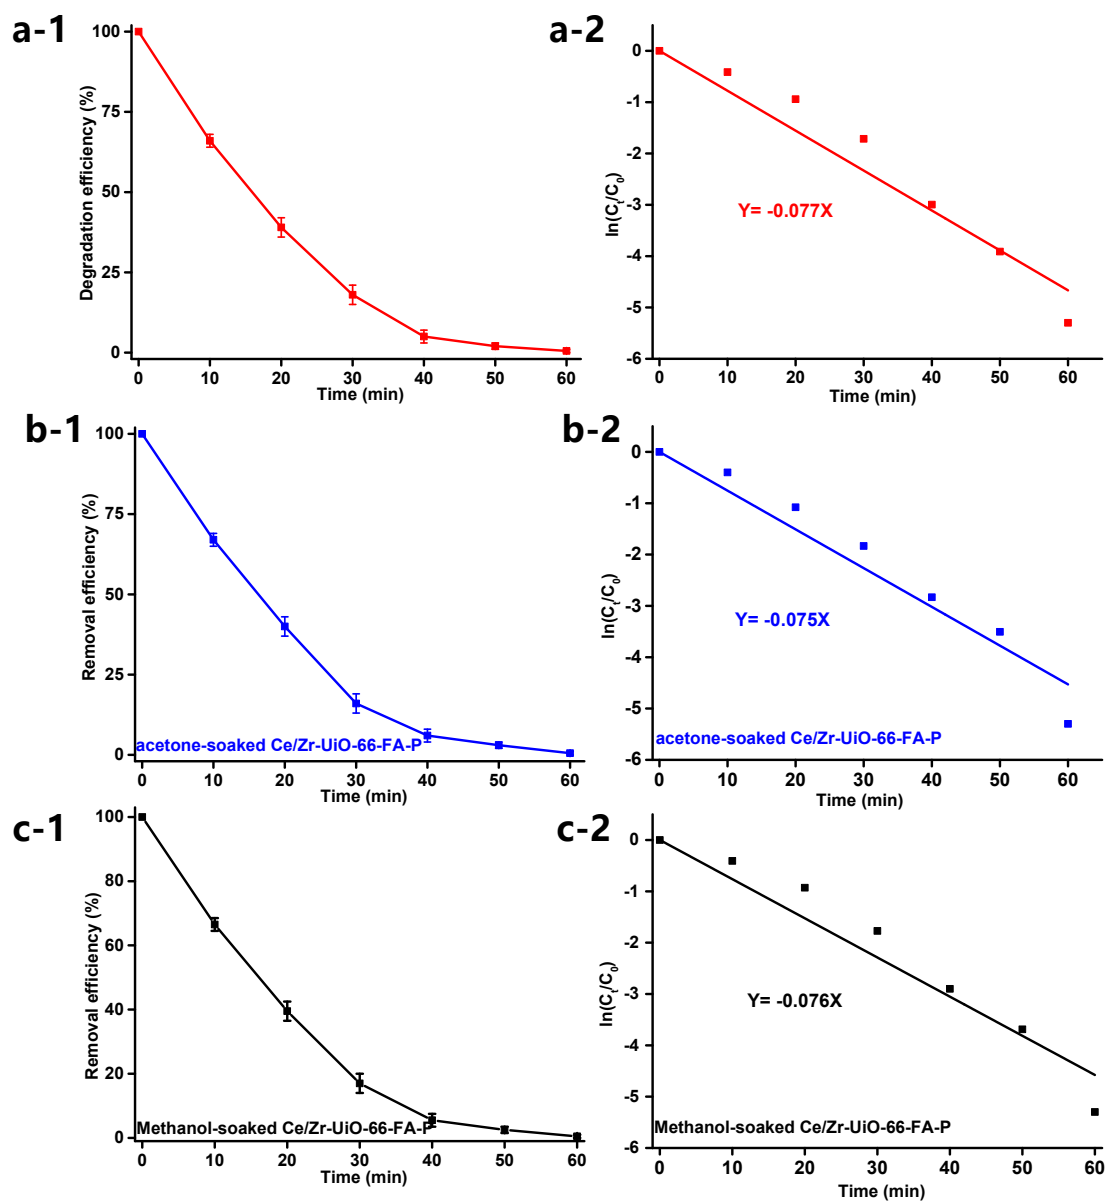

**Figure S12.** The removal efficiency for HCB at 250 °C in different time over cyclohexane-soaked Ce/Zr-UiO-66-FA-P (a-1), acetone-soaked Ce/Zr-UiO-66-FA-P (b-1) and methanol-soaked Ce/Zr-UiO-66-FA-P (c-1); The first order kinetics model of HCB degradation over cyclohexane-soaked Ce/Zr-UiO-66-FA-P (a-2), acetone-soaked Ce/Zr-UiO-66-FA-P (b-2) and methanol-soaked Ce/Zr-UiO-66-FA-P (c-2).



**S13 The different the number of open metal sites in the Ce/Zr-UiO-66-FA-P metal clusters of the degradation efficiency and carbon distribution of the products in the catalytic degradation of HCB**

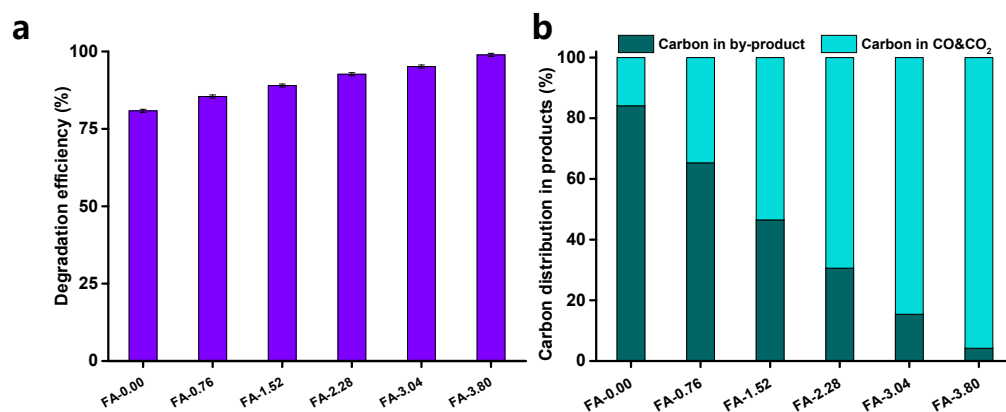

**Figure S13.** (a) Degradation efficiency of HCB at 150 °C and (b) carbon distribution of the products at 250 °C over the different number of open-metal sites on the Ce/Zr-UiO-66 metal clusters

**Table S6.** Number of formate ligands and after post-treatment per clusters for FA-0.00/0.76/1.52/2.28/3.04/3.80

| Samples | Number of formate ligands per cluster | After post-treatment Number of formate ligands per cluster |
|---------|---------------------------------------|------------------------------------------------------------|
| FA-0.00 | 0.19                                  | 0.00                                                       |
| FA-0.76 | 1.45                                  | 0.00                                                       |
| FA-1.52 | 1.76                                  | 0.00                                                       |
| FA-2.28 | 2.10                                  | 0.00                                                       |
| FA-3.04 | 2.41                                  | 0.00                                                       |
| FA-3.80 | 2.69                                  | 0.00                                                       |

## S14 The effect of crystal size and the number of defects on the surface acidity and degradation efficiency for HCB.

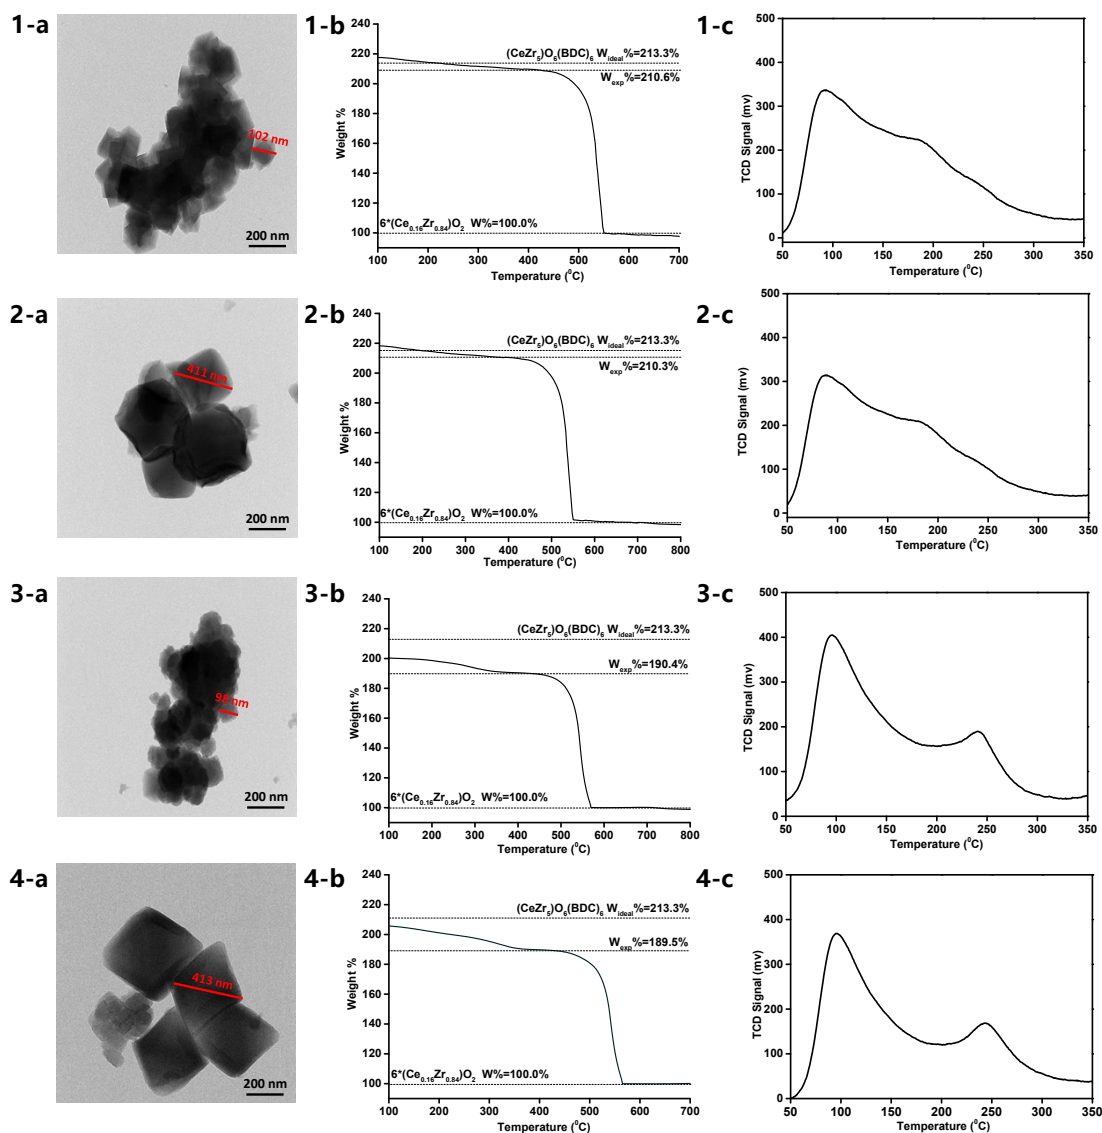

**Figure S14.** Ce/Zr-UiO-66-P-0.29, Ce/Zr-UiO-66-FA-P-0.32, Ce/Zr-UiO-66-P-2.49 and Ce/Zr-UiO-66-FA-P-2.52 of (a) TEM images; (b) TGA curve and (c) NH<sub>3</sub>-TPD

**Table S7.** Crystal size, Number of missing linkers per cluster and Total amount of acidity of Ce/Zr-UiO-66-P-0.29, Ce/Zr-UiO-66-FA-P-0.32, Ce/Zr-UiO-66-P-2.43 and Ce/Zr-UiO-66-FA-P-2.52

| Samples                | Crystal size (nm) | Number of missing linkers per cluster | Total amount (mmol NH <sub>3</sub> /g) |
|------------------------|-------------------|---------------------------------------|----------------------------------------|
| Ce/Zr-UiO-66-P-0.29    | 102               | 0.29                                  | 1.21                                   |
| Ce/Zr-UiO-66-FA-P-0.32 | 411               | 0.32                                  | 1.17                                   |
| Ce/Zr-UiO-66-P-2.43    | 98                | 2.43                                  | 3.83                                   |
| Ce/Zr-UiO-66-FA-P-2.52 | 413               | 2.52                                  | 3.64                                   |

**Synthesis of Ce/Zr-UiO-66-P-2.43:** We mixed 100 mg of Ce/Zr-UiO-66-P with 30 ml DMF and 3.8 ml formic acid and heated it for 12 hours at 120°C. After washing with DMF and acetone, followed by 12 hours of high vacuum activation at 120°C and post-treatment with methanol and water vapor. In Fig. 4 and Table 3, its crystal size was 98 nm with 2.43 missing linkers per cluster..

**Synthesis of Ce/Zr-UiO-66-FA-P-0.32:** To construct Ce/Zr-UiO-66-FA-P with a large crystal size and little defect sites on the clusters, we mixed 100 mg of Ce/Zr-UiO-66-FA-P with 30 ml of DMF and 0.167g of H2BDC and heated it for 12 hours at 120°C. After washing with DMF and acetone, followed by 12 hours of high vacuum activation at 120°C and post-treatment with methanol and water vapor. In Fig. 4 and Table 3, its crystal size was 413 nm with 0.32 missing linkers per cluster.

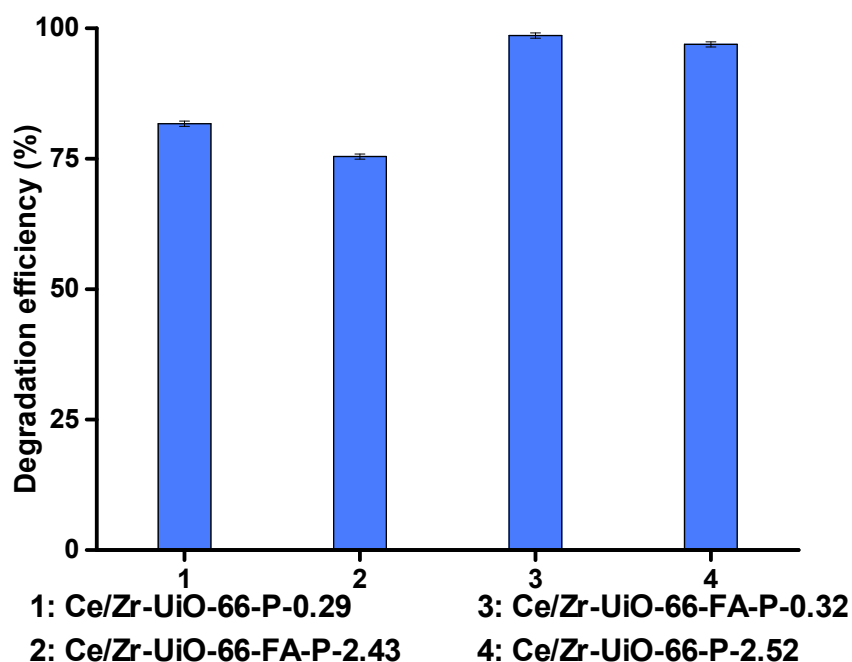

**Figure S15.** Degradation efficiency for HCB at 150 °C in 1h over Ce/Zr-UiO-66-P-0.29, Ce/Zr-UiO-66-FA-P-0.32, Ce/Zr-UiO-66-P-2.49 and Ce/Zr-UiO-66-FA-P-2.52

**S15 The kinetic constants for the Zr-UiO-66, Ce/Zr-UiO-66-FA-P and Ce-UiO-66 in the catalytic degradation of HCB**

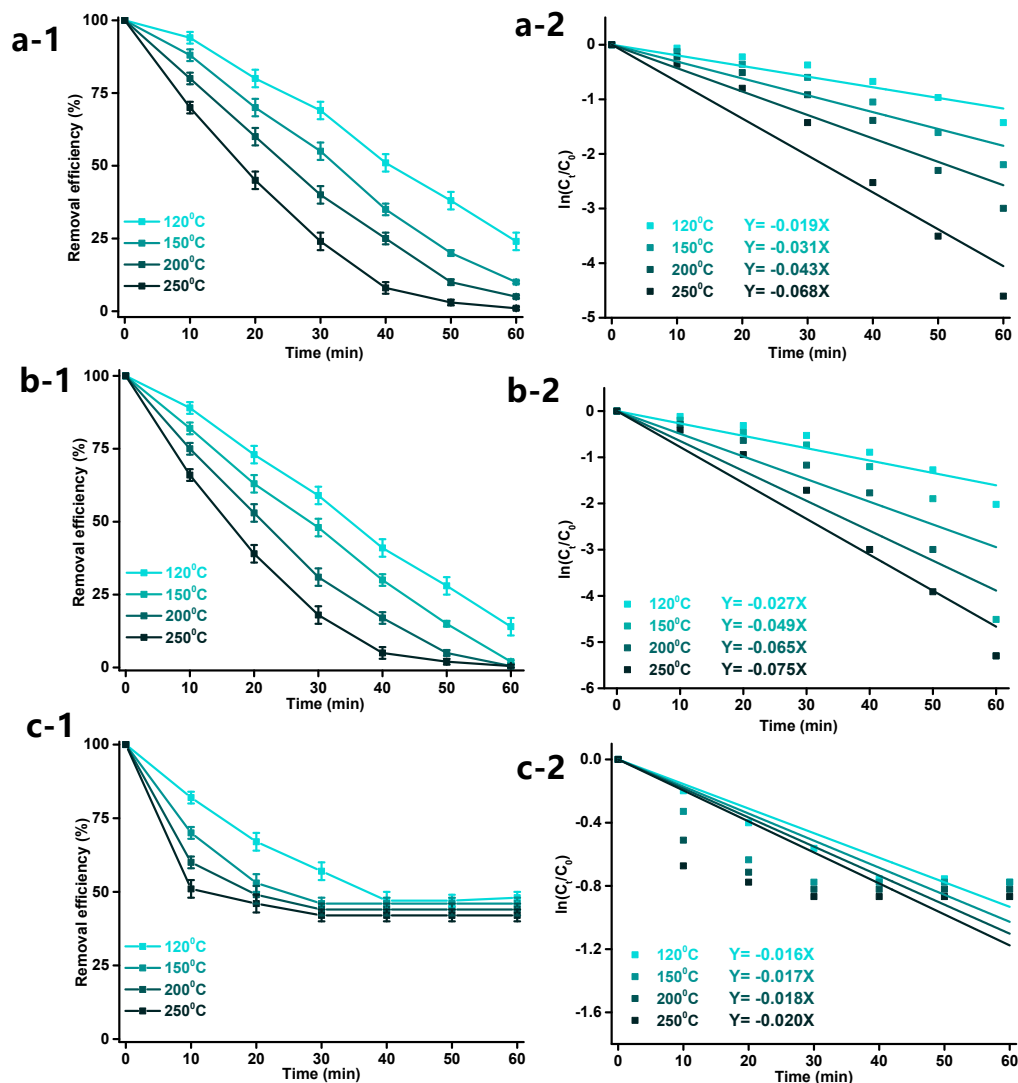

**Figure S16.** The removal efficiency for HCB at 120/150/200/250 °C in different time over Zr-UiO-66 (a-1), Ce/Zr-UiO-66-FA-P (b-1) and Ce-UiO-66 (c-1); The first order kinetics model of HCB degradation at 90/120/150/200/250 °C over Zr-UiO-66 (a-2), Ce/Zr-UiO-66-FA-P (b-2) and Ce-UiO-66 (c-2).

**S16 The activation energies TON and TOF for Zr-UiO-66, Ce/Zr-UiO-66-FA-P, Ce-UiO-66, H<sub>2</sub>BDC, ZrCl<sub>4</sub> and Ce(NH<sub>3</sub>)<sub>2</sub>(NO<sub>3</sub>) in the catalytic degradation of HCB**

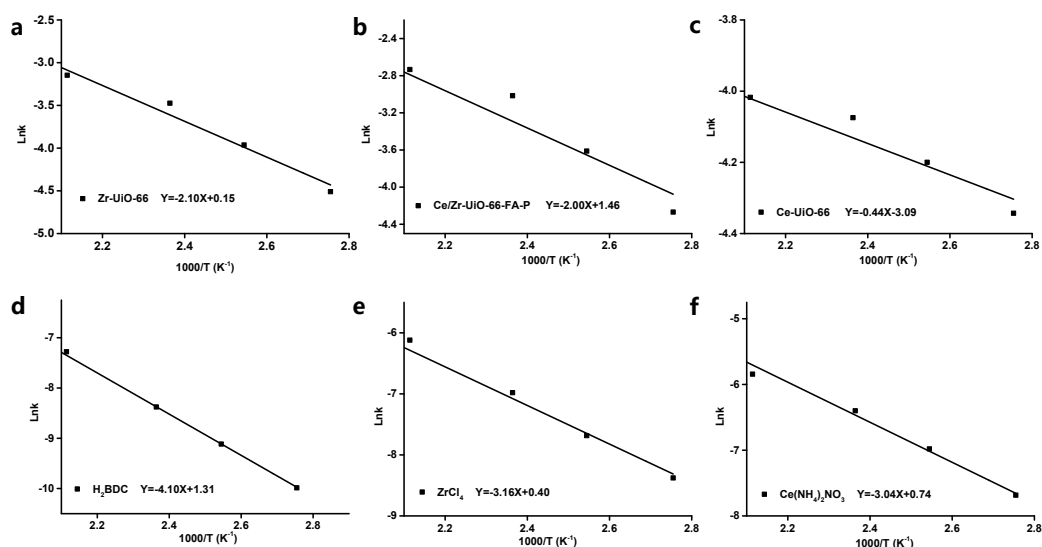

**Figure S17.** Arrhenius plots for the Zr-UiO-66 (a), Ce/Zr-UiO-66-FA-P (b) Ce-UiO-66 (c) H<sub>2</sub>BDC (d), ZrCl<sub>4</sub> (e) and Ce(NH<sub>4</sub>)<sub>2</sub>NO<sub>3</sub> (f) in the catalytic degradation of HCB.

**Table S8.** The TON and TOF for the catalytic degradation of HCB over Zr-UiO-66, Ce/Zr-UiO-66-FA-P, Ce-UiO-66, H<sub>2</sub>BDC, ZrCl<sub>4</sub> and Ce(NH<sub>3</sub>)<sub>2</sub>(NO<sub>3</sub>)

| Samples                                           | TON   | TOF     |
|---------------------------------------------------|-------|---------|
| Zr-UiO-66                                         | 0.36  | 0.0060  |
| Ce/Zr-UiO-66-FA-P                                 | 0.39  | 0.0065  |
| Ce-UiO-66                                         | 0.22  | 0.0037  |
| H <sub>2</sub> BDC                                | 0.053 | 0.00088 |
| ZrCl <sub>4</sub>                                 | 0.12  | 0.0019  |
| Ce(NH <sub>3</sub> ) <sub>2</sub> NO <sub>3</sub> | 0.15  | 0.0024  |

S17 PXRD pattern of  $Ce_xZr_{1-x}O_2$

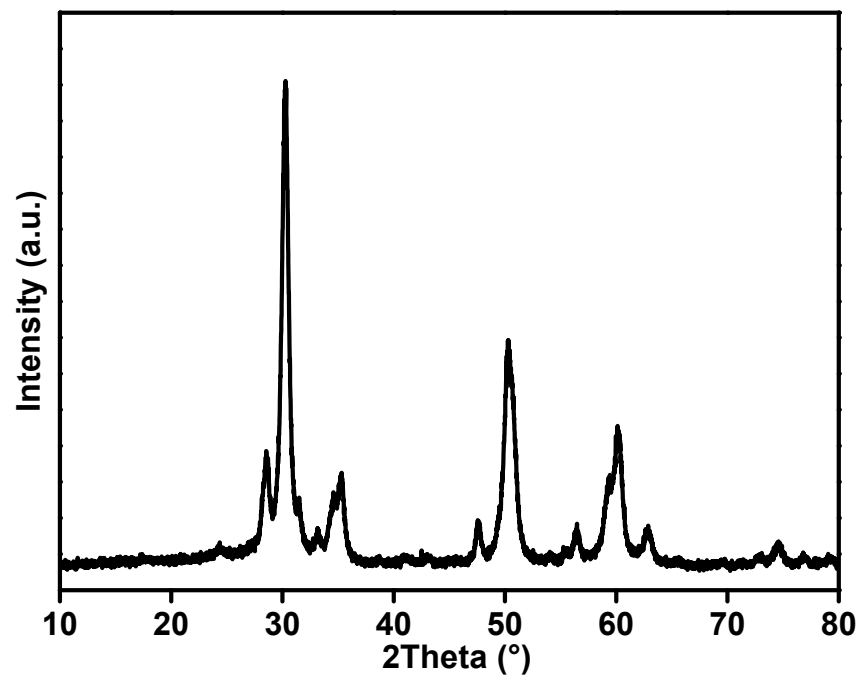

Figure S18. PXRD pattern of  $Ce_xZr_{1-x}O_2$ .

## S18 GC chromatograms of CO and CO<sub>2</sub>

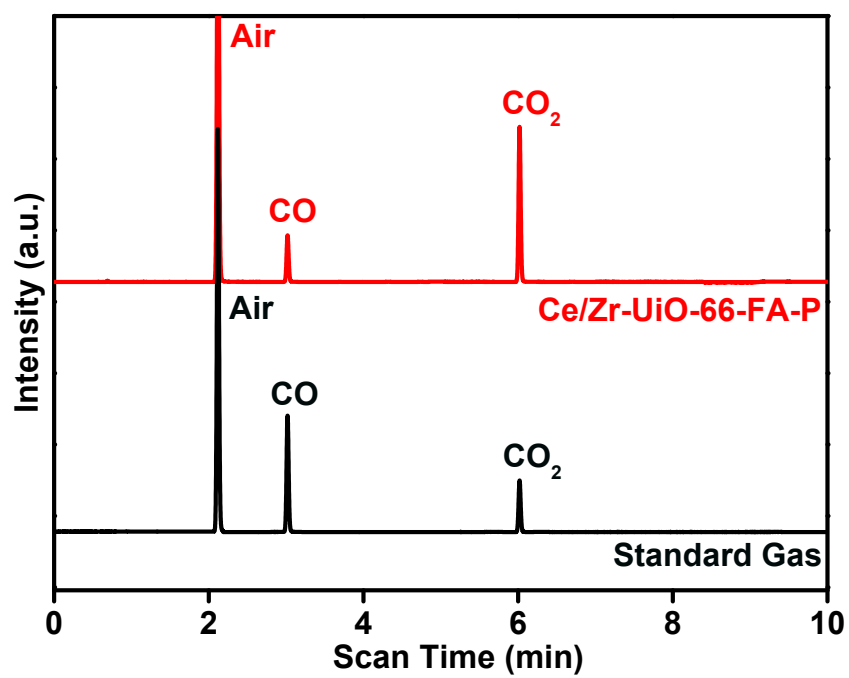

**Figure S19.** The GC chromatograms of CO and CO<sub>2</sub> from the reaction of HCB decomposition over Ce/Zr-UiO-66-FA-P catalyst at 250 °C for 1 h.

## S19 Degradation efficiency of HCB over Metal Oxides and MOFs at 250 °C

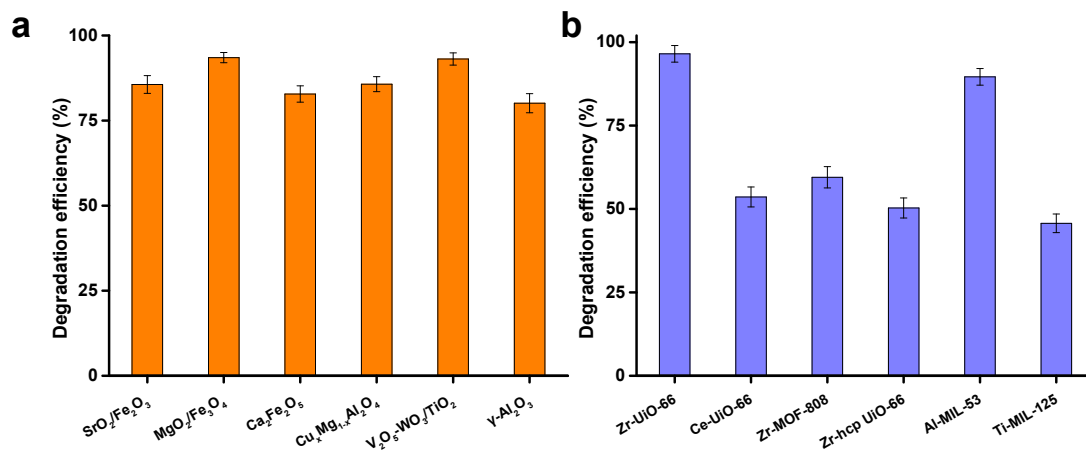

Figure S20. (a) Metal Oxides and (b) MOFs of the Degradation efficiency for HCB at 250 °C in

1h.



**S20 PXRD patterns of the Zr-UiO-66, Ce-UiO-66, Zr-MOF-808, Zr-hcp UiO-66, Al-MIL-53 and Ti-MIL-125**

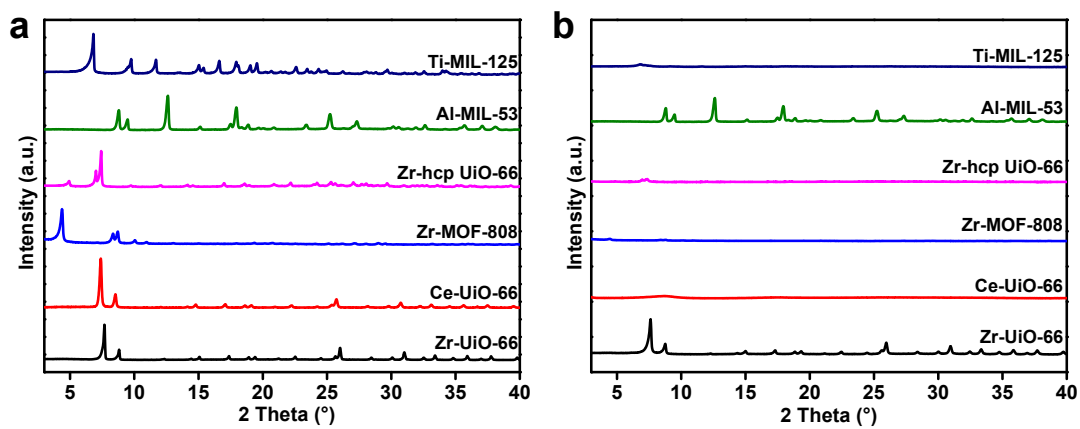

**Figure S21.** PXRD patterns of Zr-UiO-66, Ce-UiO-66, Zr-MOF-808, Zr-hcp UiO-66, Al-MIL-53, Ti-MIL-125 before catalytic degradation of HCB reaction (a) and after the reaction (b).

## S21 Carbon distribution of the products over Metal Oxides and MOFs

in the degradation of HCB at 250 °C

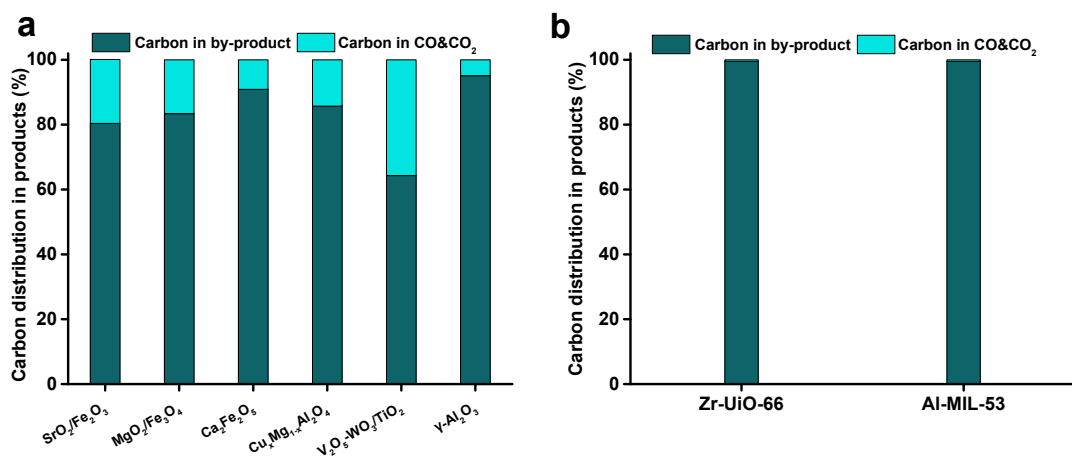

**Figure S22.** Carbon distribution of the products over (a) Metal Oxides and (b) MOFs for the catalytic degradation of HCB at 250 °C in 1h.

**S22 Degradation efficiency of HCB and Carbon distribution of the products over Benchmarked acid/redox catalysts in the catalytic degradation of HCB.**

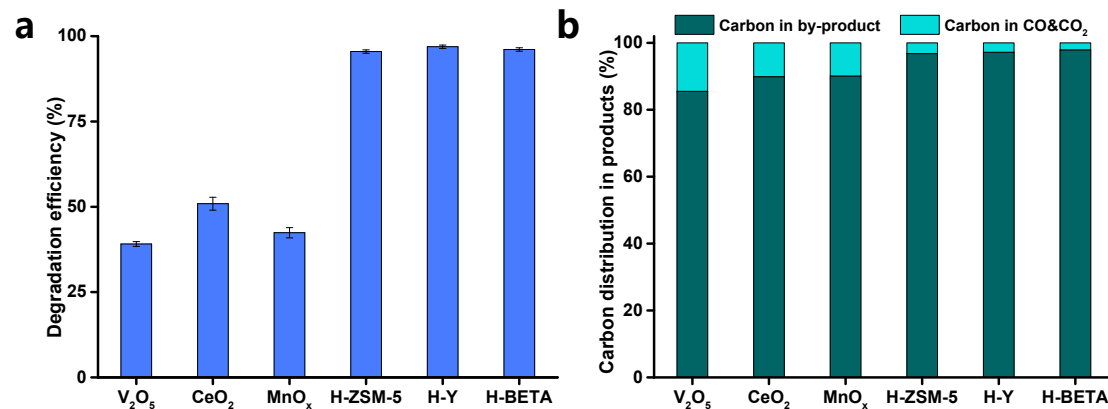

**Figure S23.** (a) Benchmarked acid/redox catalysts of the Degradation efficiency for HCB at 250 °C in 1h; (b) Carbon distribution of the products over Benchmarked acid/redox catalysts for the catalytic degradation of HCB at 250 °C in 1h.

## S23 Characterization of catalysts after stability tests

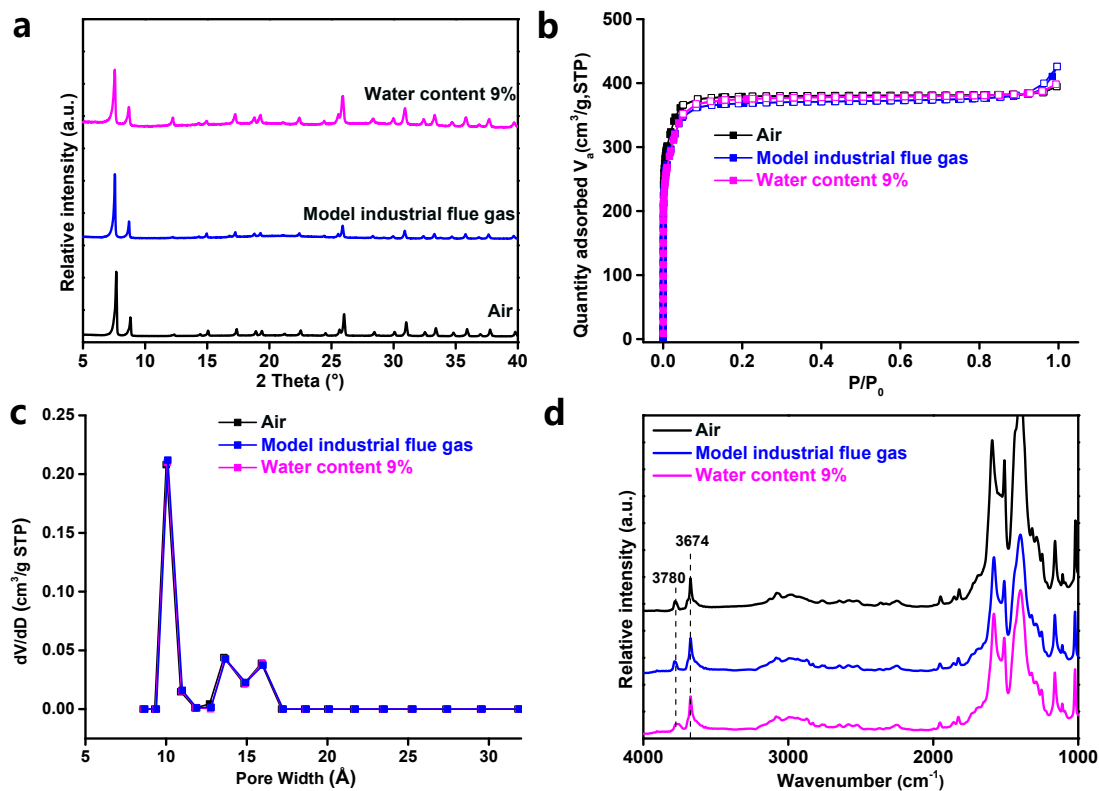

**Figure S24.** (a) PXRD pattern, (b) N<sub>2</sub> isotherms, (c) Pore size distributions and (d) FT-IR spectra for Ce/Zr-UiO-66-FA-P after the catalyst stability tests.

**Table S9.** Number of defect sites per clusters and BET surface area of Ce/Zr-UiO-66-FA-P and Ce/Zr-UiO-66-FA-P after reaction.

| Samples                                           | Defect sites per clusters | BET surface area (m <sup>2</sup> /g) | Pore Volume (cm <sup>3</sup> /g) |
|---------------------------------------------------|---------------------------|--------------------------------------|----------------------------------|
| Ce/Zr-UiO-66-FA-P<br>in air                       | 2.69                      | 1347                                 | 0.65                             |
| Ce/Zr-UiO-66-FA-P<br>in model industrial flus gas | 2.76                      | 1352                                 | 0.66                             |
| Ce/Zr-UiO-66-FA-P<br>in water content 9%          | 2.73                      | 1345                                 | 0.65                             |

## S24 Carbon distribution of the products for the catalytic degradation of HCB in the catalytic stability testing of Ce/Zr-UiO-66-FA-P

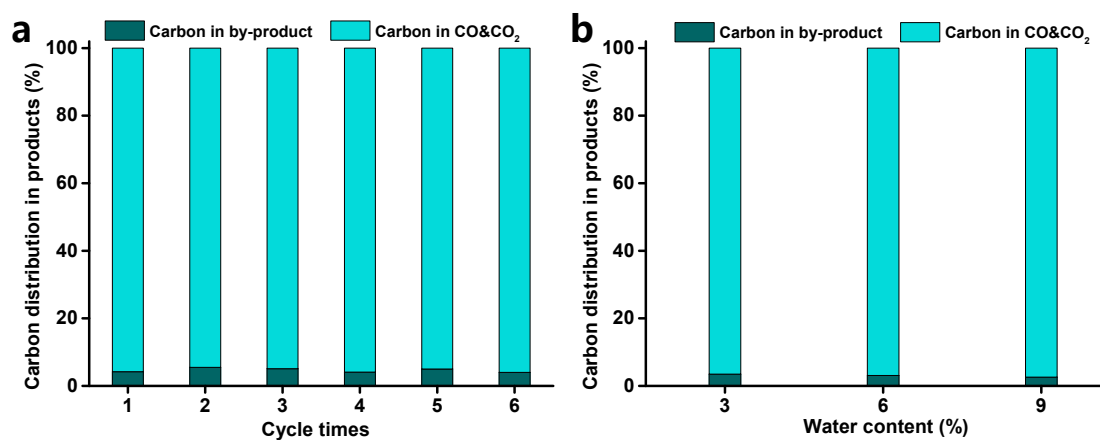

**Figure S25.** Carbon distribution of the products for the catalytic degradation of HCB in the catalytic stability testing of Ce/Zr-UiO-66-FA-P (a) Cycle reaction; (b) Different water content.

## S25 Reusability of spent catalysts

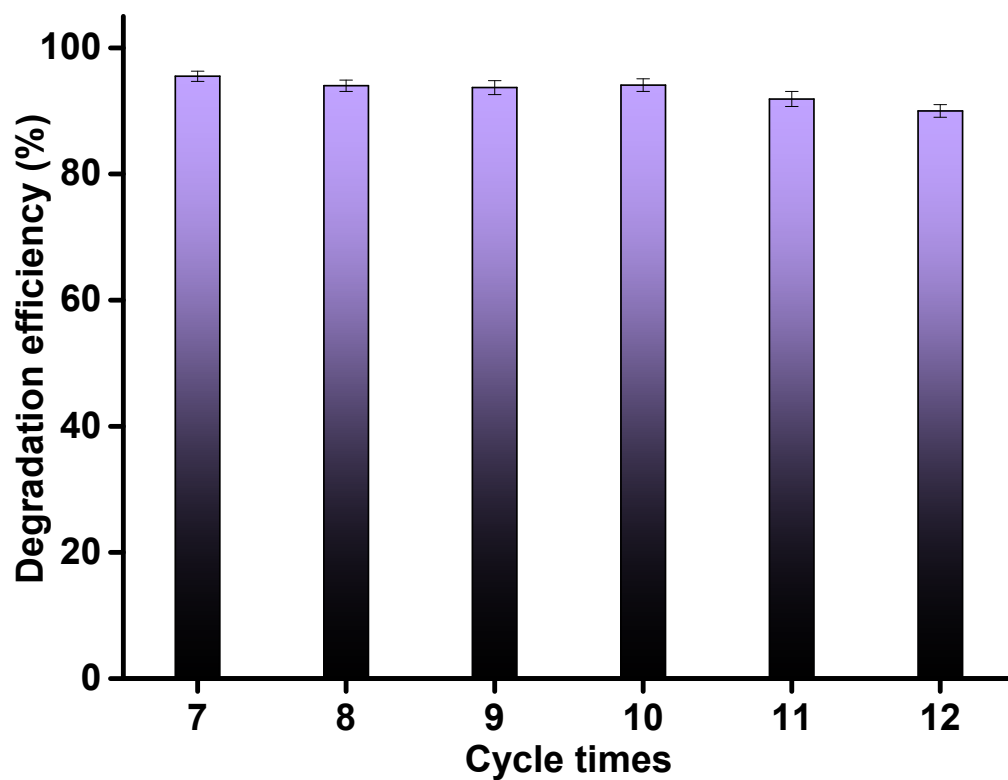

**Figure S26.** Catalytic degradation efficiency of HCB in model industrial flue gas over Ce/Zr-UiO-66-FA-P for six cycles reaction at 250 °C.

**S26 Ce 3d XPS spectra of Ce/Zr-UiO-66-FA-P at 30 minutes during the catalytic degradation of HCB.**

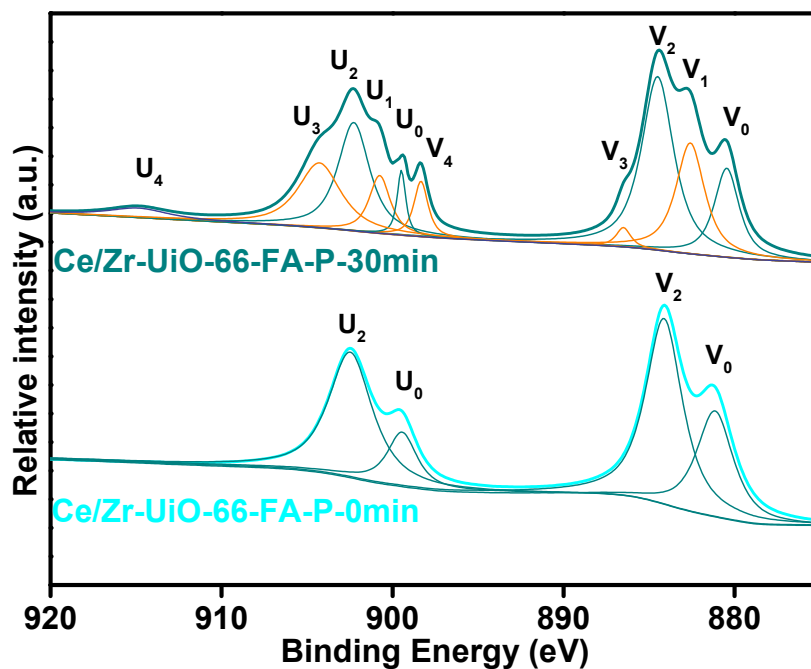

**Figure S27.** Ce 3d XPS spectra of Ce/Zr-UiO-66-FA-P at 0 minutes and 30 minutes during the catalytic degradation of HCB
